# Supplementary material
Source: Royal Society of Chemistry journal article supplement (doi:10.1039/d6tc00352d)
Supplement: d6tc00352d1.pdf [file d6tc00352d1.pdf]

## Supporting information

### A Deep Blue TADF Dendron for Efficient Energy Transfer in Green and Red Iridium Light Emitting Dendrimers.

Mile Gao, Akash Thamarappalli, Manikandan Koodalingam, Jos C. M. Kistemaker, Junhyuk Jang, Paul L. Burn\*, Emma V. Puttock, Paul E. Shaw\*

Centre for Organic Photonics & Electronics (COPE), School of Chemistry & Molecular Biosciences, University of Queensland, St. Lucia, QLD, 4072, Australia.

\*p.burn2@uq.edu.au, p.shaw3@uq.edu.au

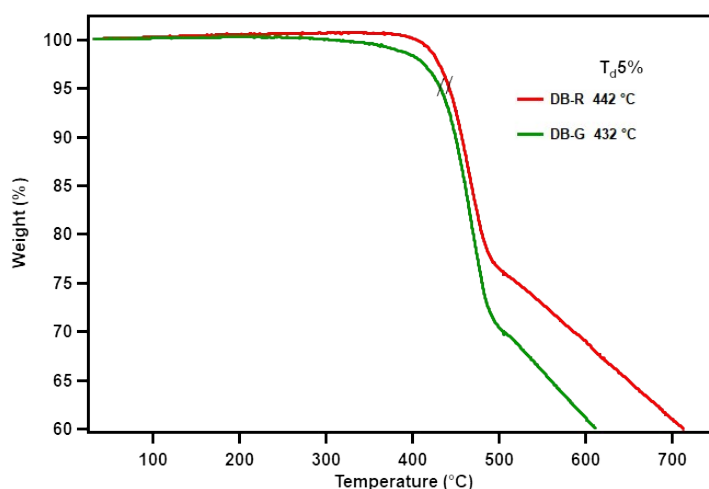

**Figure. S1** TGA thermograms of **DB-G** and **DB-R** from 30–700 °C at a heating rate of 10 °C min<sup>-1</sup>.

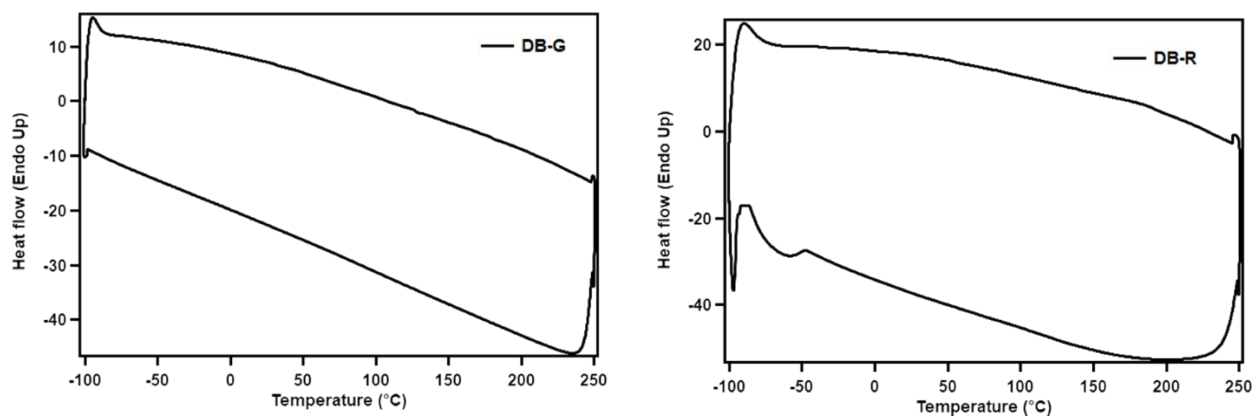

**Figure. S2** DSC analysis of (a) **DB-G** and (b) **DB-R**. The measurements were performed in the temperature range of -100 to 250 °C at a scan rate of 100 °C min<sup>-1</sup>. The second scans are shown.

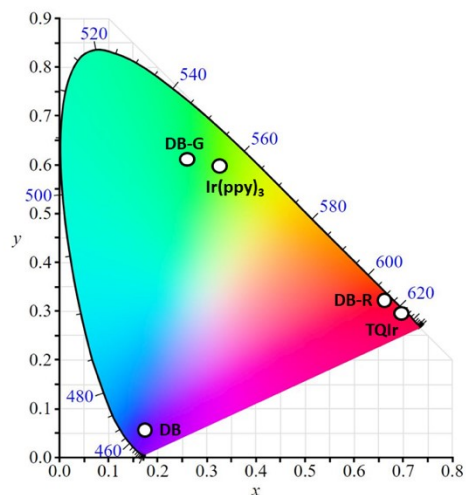

**Figure. S3** The 1931 Commission Internationale de l'Eclairage coordinates for **DB-G**, **DB-R**, **TQIr**, **Ir(ppy)<sub>3</sub>** and **DB**.

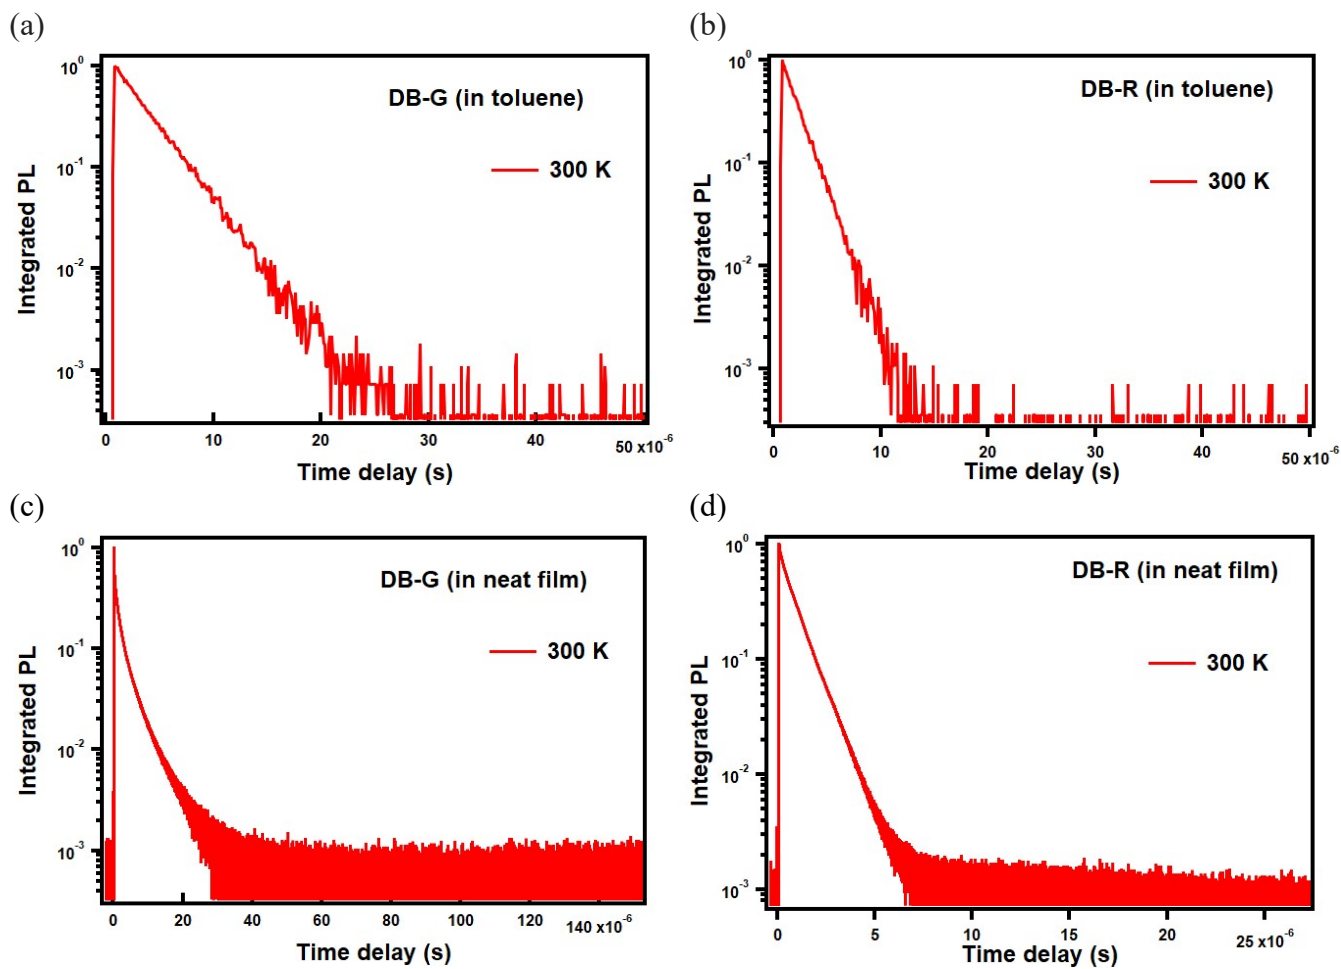

**Figure S4.** Solution and neat film PL decays of **DB-G** (a and c) and **DB-R** (b and d), respectively at 300 K ( $\lambda_{\text{exc}} = 355 \text{ nm}$ ).

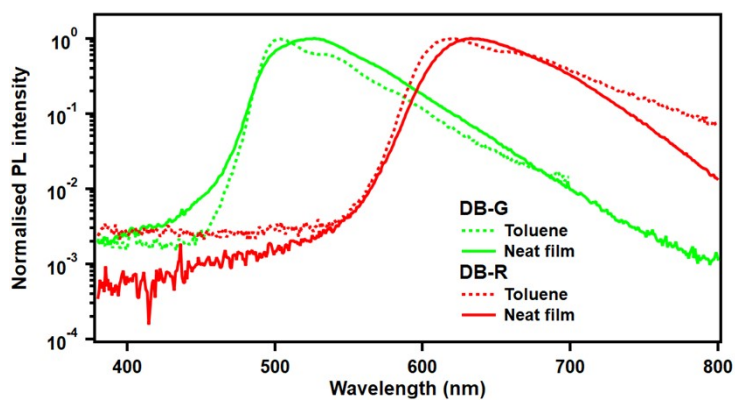

**Figure S5.** Comparison of the solution and film PL spectra of **DB-G** and **DB-R**.

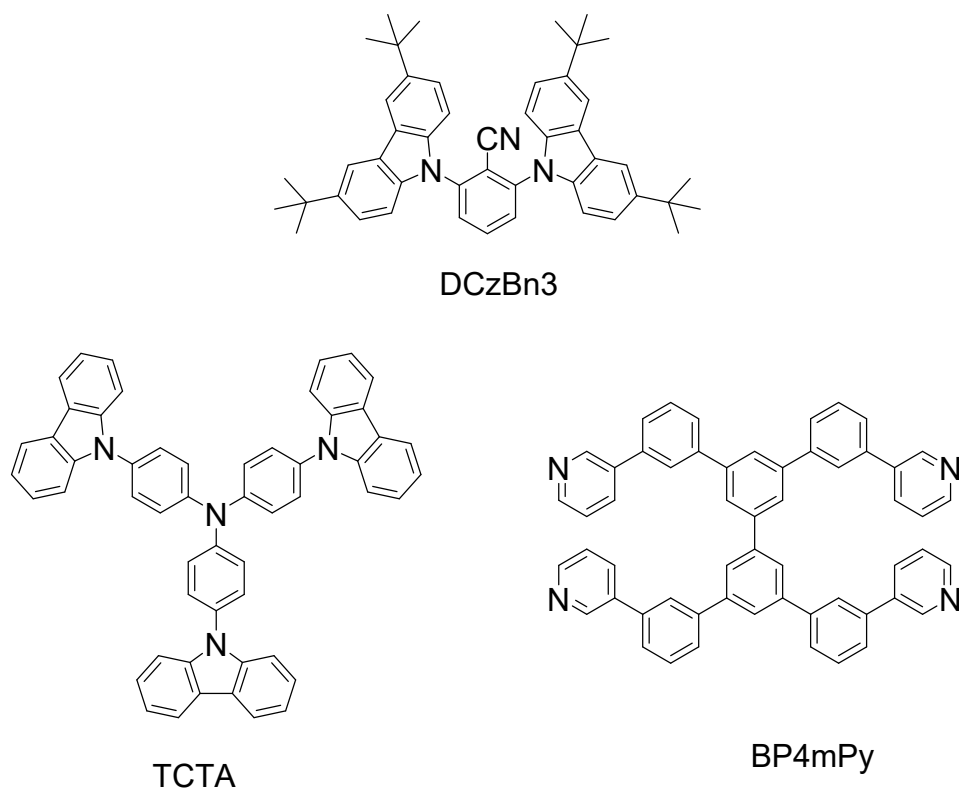

**Figure S6.** Structures of DCzBn3, TCTA and BP4mPy.

**Table S1.** Fits to the neat film PL decays of Figure S4

| Compound                      | $A_1$ | $\tau_1$ ( $\mu\text{s}$ ) | $A_2$ | $\tau_2$ ( $\mu\text{s}$ ) | $A_3$ | $\tau_3$ ( $\mu\text{s}$ ) |
|-------------------------------|-------|----------------------------|-------|----------------------------|-------|----------------------------|
| <b>DB-R</b>                   | 0.46  | 0.12                       | 0.89  | 0.90                       | -     | -                          |
| <b>DB-G</b> (bi-exp fitting)  | 0.59  | 0.65                       | 0.25  | 3.5                        | -     | -                          |
| <b>DB-G</b> (tri-exp fitting) | 0.42  | 0.20                       | 0.41  | 1.2                        | 0.14  | 4.8                        |

**Table S2: Summary of device performance characteristics of solution processed phosphorescent dendrimer and TADF-sensitised phosphorescent OLEDs.**

| Reference                                      | Host     | Emitter           | EQE (%)                       | Color         | CIE            |
|------------------------------------------------|----------|-------------------|-------------------------------|---------------|----------------|
| Chemical Engineering Journal 455 (2023) 140747 | mCPCN    | TriTADF-Ir(dFppy) | 16 @ 1000 cd m <sup>-2</sup>  | Greenish-Blue | (0.174, 0.438) |
| Adv. Funct. Mater. 2022, 32, 2205077           | mCPCN    | GG                | 6.2 @ 500 cd m <sup>-2</sup>  | Green         | (0.41, 0.56)   |
| Adv. Funct. Mater. 2022, 32, 2205077           | mCPCN    | BG                | 11.6 @ 500 cd m <sup>-2</sup> | Green         | (0.32, 0.63)   |
| J. Mater. Chem. C, 2022, 10, 4637              | DMAC-DPS | R-D2              | 9.1 @ 1000 cd m <sup>-2</sup> | Red           | (0.62,0.35)    |
| J. Mater. Chem. C, 2023, 11, 16247             | 4Cz-SO   | Flrpic            | 13.7                          | Blue          | (0.14,0.12)    |
| Chemical Physics Letters 877 (2025) 142215     | CDFDB    | Flrpic            | 20.21                         | Blue          | (0.17,0.40)    |
| Adv. Optical Mater. 2024, 12, 2400640          | TCTA     | D3                | 13.3 @ 500 cd m <sup>-2</sup> | Red           | -              |
| Organic Electronics 138 (2025) 107192          | TCTA     | D2                | 12.2 @ 500 cd m <sup>-2</sup> | Green         | -              |
